# Supplementary material for: A Bibliometric Analysis of Publications on Endoscopic Ultrasound
Source: Frontiers journal article supplement (doi:10.3389/fmed.2022.869004), 2022-03-29

Supplemental material

Figure S1. Flow chart of endoscopic ultrasound research inclusion.

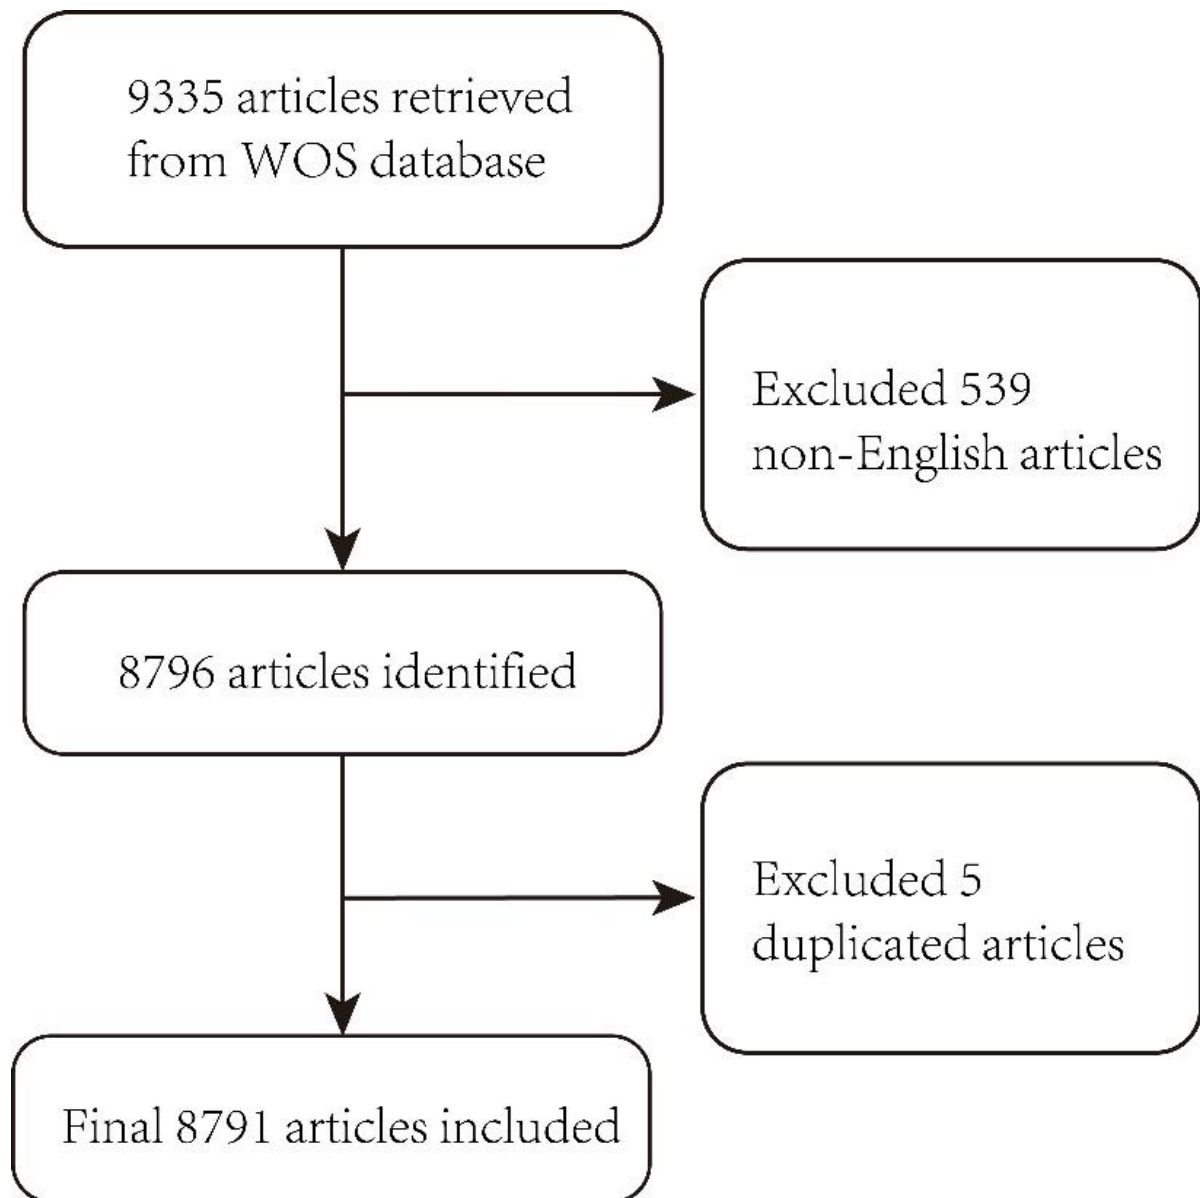

Supplement: Image_1.pdf [file Image_1.pdf]
